# Supplementary material for: Oil Palm Cultivation Critically Affects Sociality in an Endangered Malaysian Primate
Source: Research Square preprint supplement (doi:10.21203/rs.3.rs-129385/v1), 2020-12-21
Supplement: Supplementary file 1 [file 84ee9930ab14cb9edec49e5e.pdf]

## Supplementary Information

### Oil palm cultivation critically affects sociality in an endangered Malaysian primate

Anna Holzner, Krishna N. Balasubramaniam, Nadine Ruppert, Anja Widdig

## Supplementary Figure

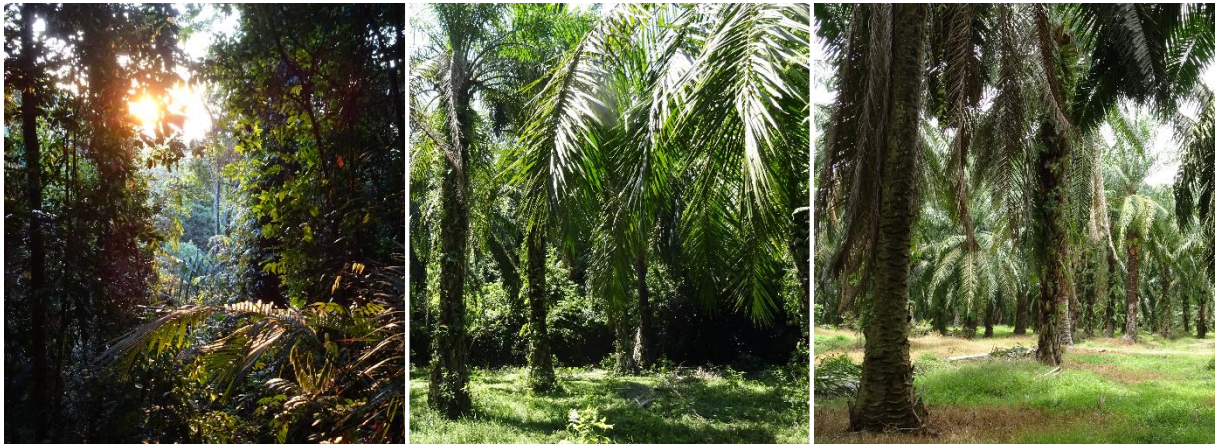

**Figure S1. Habitat types at the study site in Segari, Peninsular Malaysia.** From left to right: tropical rainforest, plantation edge (i.e. oil palm plantation area within 50 metres from the forest border) and plantation (i.e. areas of oil palm plantation at a distance of more than 50 metres from the forest border).

## Supplementary Tables

**Table S1. Results of the GLMMs exploring the effect of the habitat on the rates of grooming (model 1), social play (model 2) and non-physical aggression (model 4) among Southern pig-tailed macaques.** Shown are model estimates, standard errors (SE), lower and upper confidence intervals (CI) and test results of individual effects. Control variables are not interpreted. Significant p-values are shown in bold. As the full-null model comparison of model 3 (physical aggression) did not reveal significance (LRT habitat:  $\chi^2 = 2.11$ ,  $df = 2$ ,  $p = 0.35$ ), no details about individual effects are presented.

| Predictor variable                                       | Estimate | SE   | lower CI | upper CI |   | X <sup>2</sup> | P       |       |
|----------------------------------------------------------|----------|------|----------|----------|---|----------------|---------|-------|
| Rate of grooming (model 1)                               |          |      |          |          |   |                |         |       |
| Intercept                                                | -0.06    | 0.24 | -0.53    | 0.38     | } | 120.96         | < 0.001 |       |
| Habitat (forest vs. plantation edge) <sup>a</sup>        | -0.78    | 0.14 | -1.05    | -0.54    |   |                |         |       |
| Habitat (forest vs. plantation) <sup>a</sup>             | -3.80    | 0.36 | -4.75    | -3.25    |   |                |         |       |
| Control variables                                        |          |      |          |          |   |                |         |       |
| Age-sex class (adult ♂ vs. adult ♀) <sup>b</sup>         | 1.13     | 0.24 | 0.67     | 1.57     | } | 20.36          | < 0.001 |       |
| Age-sex class (adult ♂ vs. immature ♂) <sup>b</sup>      | 0.67     | 0.31 | 0.07     | 1.24     |   |                |         |       |
| Age-sex class (adult ♂ vs. immature ♀) <sup>b</sup>      | 1.01     | 0.28 | 0.43     | 1.56     |   |                |         |       |
| Rank <sup>c</sup>                                        | 0.04     | 0.10 | -0.16    | 0.24     | } | 0.12           | 0.73    |       |
| Group (AMY=0, VOL=1)                                     | -0.66    | 0.25 | -1.18    | -0.17    |   | 6.72           | 0.010   |       |
| Daytime (early morning vs. late morning) <sup>d</sup>    | -0.04    | 0.13 | -0.28    | 0.21     |   | }              | 2.67    | 0.45  |
| Daytime (early morning vs. early afternoon) <sup>d</sup> | -0.26    | 0.17 | -0.60    | 0.05     |   |                |         |       |
| Daytime (early morning vs. late afternoon) <sup>d</sup>  | -0.04    | 0.17 | -0.33    | 0.27     |   |                |         |       |
| Rate of social play (model 2)                            |          |      |          |          |   |                |         |       |
| Intercept                                                | 1.65     | 0.35 | 0.97     | 2.31     | } | 40.28          | < 0.001 |       |
| Habitat (forest vs. plantation edge) <sup>a</sup>        | -1.97    | 0.30 | -2.67    | -1.47    |   |                |         |       |
| Habitat (forest vs. plantation) <sup>a</sup>             | -1.76    | 0.33 | -2.49    | -1.23    |   |                |         |       |
| Control variables                                        |          |      |          |          |   |                |         |       |
| Age-sex class (♂ = 0, ♀ = 1)                             | -1.31    | 0.40 | -2.05    | -0.55    | } | 9.00           | 0.003   |       |
| Rank <sup>e</sup>                                        | -0.08    | 0.19 | -0.48    | 0.34     |   | 0.18           | 0.67    |       |
| Group (AMY=0, VOL=1)                                     | -1.56    | 0.76 | -3.62    | -0.24    |   | 4.10           | 0.043   |       |
| Daytime (early morning vs. late morning) <sup>d</sup>    | -0.80    | 0.31 | -1.39    | -0.21    |   | }              | 12.32   | 0.006 |
| Daytime (early morning vs. early afternoon) <sup>d</sup> | -0.81    | 0.30 | -1.41    | -0.23    |   |                |         |       |
| Daytime (early morning vs. late afternoon) <sup>d</sup>  | -0.54    | 0.27 | -1.15    | -0.03    |   |                |         |       |
| Rate of non-physical aggression (model 4)                |          |      |          |          |   |                |         |       |
| Intercept                                                | -0.59    | 0.20 | -1.02    | -0.21    | } | 6.06           | 0.048   |       |
| Habitat (forest vs. plantation edge) <sup>a</sup>        | 0.07     | 0.19 | -0.35    | 0.41     |   |                |         |       |
| Habitat (forest vs. plantation) <sup>a</sup>             | 0.44     | 0.17 | 0.10     | 0.76     |   |                |         |       |
| Control variables                                        |          |      |          |          |   |                |         |       |
| Age-sex class (adult ♂ vs. adult ♀) <sup>b</sup>         | -0.69    | 0.17 | -1.00    | -0.36    | } | 23.39          | < 0.001 |       |
| Age-sex class (adult ♂ vs. immature ♂) <sup>b</sup>      | -0.28    | 0.23 | -0.74    | 0.14     |   |                |         |       |
| Age-sex class (adult ♂ vs. immature ♀) <sup>b</sup>      | -1.00    | 0.23 | -1.48    | -0.58    |   |                |         |       |
| Rank <sup>c</sup>                                        | -0.16    | 0.07 | -0.30    | -0.03    | } | 4.64           | 0.031   |       |
| Group (AMY=0, VOL=1)                                     | 0.35     | 0.18 | 0.002    | 0.67     |   | 3.80           | 0.051   |       |
| Daytime (early morning vs. late morning) <sup>d</sup>    | -0.25    | 0.19 | -0.61    | 0.13     |   | }              | 4.21    | 0.24  |
| Daytime (early morning vs. early afternoon) <sup>d</sup> | -0.23    | 0.17 | -0.58    | 0.11     |   |                |         |       |
| Daytime (early morning vs. late afternoon) <sup>d</sup>  | 0.06     | 0.19 | -0.34    | 0.45     |   |                |         |       |

<sup>a</sup>Reference level is forest.

<sup>b</sup>Reference level is adult male.

<sup>c</sup>z-transformed to mean = 0 and SD = 1 prior to model fitting; original mean (SD) was 0.51 (0.35).

<sup>d</sup>Reference level is early morning.

<sup>e</sup>z-transformed to mean = 0 and SD = 1 prior to model fitting; original mean (SD) was 0.51 (0.34).

**Table S2. Results of the GLMM exploring the effect of habitat and its interaction with dominance rank and age-sex class on the macaques' individual scores of eigenvector centrality (model 6).** Shown are model estimates, standard errors (SE), lower and upper confidence intervals (CI) as well as original and permuted p-values of the three-way interaction. Permuted p-values were obtained by comparing the observed regression coefficients with a distribution of 1,000 coefficients generated by randomly swapping the nodes of the social network prior to extracting centrality scores. Significance is indicated in bold.

| Predictor variable                                                                | Estimate | SE   | lower CI | upper CI | P     | P <sub>permuted</sub> |
|-----------------------------------------------------------------------------------|----------|------|----------|----------|-------|-----------------------|
| Intercept                                                                         | 0.34     | 0.07 | 0.20     | 0.48     |       |                       |
| <i>Predictors included in interaction</i>                                         |          |      |          |          |       |                       |
| Habitat (forest = 0, plantation edge = 1)                                         | -0.26    | 0.10 | -0.46    | -0.07    | d     | d                     |
| Rank <sup>a</sup>                                                                 | 0.04     | 0.07 | -0.11    | 0.19     | d     | d                     |
| Age-sex class (adult ♂ vs. adult ♀) <sup>b</sup>                                  | 0.21     | 0.09 | 0.03     | 0.40     | d     | d                     |
| Age-sex class (adult ♂ vs. immature ♀) <sup>b</sup>                               | 0.14     | 0.10 | -0.05    | 0.35     | d     | d                     |
| Age-sex class (adult ♂ vs. immature ♂) <sup>b</sup>                               | 0.10     | 0.11 | -0.12    | 0.30     | d     | d                     |
| <i>Two-way interaction</i>                                                        |          |      |          |          |       |                       |
| Habitat <sup>c</sup> * rank                                                       | -0.02    | 0.10 | -0.22    | 0.19     | d     | d                     |
| Habitat <sup>c</sup> * age-sex class (adult ♂ vs. adult ♀) <sup>b</sup>           | -0.08    | 0.12 | -0.32    | 0.19     | d     | d                     |
| Habitat <sup>c</sup> * age-sex class (adult ♂ vs. immature ♀) <sup>b</sup>        | 0.05     | 0.14 | -0.20    | 0.33     | d     | d                     |
| Habitat <sup>c</sup> * age-sex class (adult ♂ vs. immature ♂) <sup>b</sup>        | 0.21     | 0.15 | -0.08    | 0.51     | d     | d                     |
| Rank * age-sex class (adult ♂ vs. adult ♀) <sup>b</sup>                           | -0.17    | 0.09 | -0.36    | 0.01     | d     | d                     |
| Rank * age-sex class (adult ♂ vs. immature ♀) <sup>b</sup>                        | -0.19    | 0.10 | -0.38    | 0.009    | d     | d                     |
| Rank * age-sex class (adult ♂ vs. immature ♂) <sup>b</sup>                        | -0.11    | 0.10 | -0.31    | 0.09     | d     | d                     |
| <i>Three-way interaction<sup>e</sup></i>                                          |          |      |          |          |       |                       |
| Habitat <sup>c</sup> * rank * age-sex class (adult ♂ vs. adult ♀) <sup>b</sup>    | 0.27     | 0.13 | 0.02     | 0.53     | 0.038 | <b>0.050</b>          |
| Habitat <sup>c</sup> * rank * age-sex class (adult ♂ vs. immature ♀) <sup>b</sup> | 0.43     | 0.14 | 0.16     | 0.72     | 0.002 | <b>0.007</b>          |
| Habitat <sup>c</sup> * rank * age-sex class (adult ♂ vs. immature ♂) <sup>b</sup> | 0.26     | 0.14 | -0.04    | 0.57     | 0.073 | 0.108                 |

<sup>a</sup> z-transformed to mean = 0 and SD = 1 prior to model fitting; original mean (SD) was 0.50 (0.33).

<sup>b</sup> Reference level is adult male

<sup>c</sup> Reference level is forest.

<sup>d</sup> Values are not shown because of having a very limited interpretation as they are part of the interaction.

<sup>e</sup> The global testing (LRT habitat \* rank \* age-sex class) revealed  $X^2 = 11.50$ ,  $df = 3$ ,  $P = 0.009$ .

**Table S3. Results of the GLMMs exploring the effect of the habitat on three measures describing the mother-infant relationship in Southern pig-tailed macaques, i.e. the proportion of contact time (model 7), the rate of mothers breaking contact (model 8) and the rate of mothers increasing distance (model 9).** For all predictor variables except non-significant interactions, model estimates, standard errors (SE), lower and upper confidence intervals (CI) and test results of individual fixed effects are shown after removal of the non-significant interaction terms. Control variables are not interpreted. Significant p-values are shown in bold.

| Predictor variable                                                          | Estimate | SE   | lower CI | upper CI | X <sup>2</sup> | P       |
|-----------------------------------------------------------------------------|----------|------|----------|----------|----------------|---------|
| Contact time (model 7)                                                      |          |      |          |          |                |         |
| Intercept                                                                   | 0.70     | 0.32 | 0.09     | 1.30     | 44.91          | < 0.001 |
| Habitat (forest vs. plantation edge) <sup>a</sup>                           | 1.99     | 0.29 | 1.45     | 2.54     |                |         |
| Habitat (forest vs. plantation) <sup>a</sup>                                | 3.96     | 0.28 | 3.42     | 4.50     |                |         |
| Control variables                                                           |          |      |          |          |                |         |
| Infant age <sup>b</sup>                                                     | -2.13    | 0.15 | -2.42    | -1.87    | 31.04          | < 0.001 |
| Infant sex (♂ = 0, ♀ = 1)                                                   | 0.51     | 0.45 | -0.38    | 1.44     | 1.32           | 0.25    |
| Parity (multiparous = 0, primiparous = 1)                                   | -1.37    | 0.45 | -2.19    | -0.54    | 5.94           | 0.015   |
| Mother's rank <sup>c</sup>                                                  | 0.27     | 0.20 | -0.11    | 0.68     | 1.54           | 0.21    |
| Daytime (early morning vs. late morning) <sup>d</sup>                       | -0.74    | 0.44 | -1.62    | 0.14     | 3.53           | 0.32    |
| Daytime (early morning vs. early afternoon) <sup>d</sup>                    | 0.09     | 0.40 | -0.67    | 0.90     |                |         |
| Daytime (early morning vs. late afternoon) <sup>d</sup>                     | 0.19     | 0.28 | -0.35    | 0.81     |                |         |
| Interaction excluded due to non-significance                                |          |      |          |          |                |         |
| Habitat (forest vs. plantation edge) <sup>a</sup> * infant.age              | 0.17     | 0.36 | -0.60    | 0.84     | 0.25           | 0.88    |
| Habitat (forest vs. plantation) <sup>a</sup> * infant.age                   | -0.05    | 0.35 | -0.81    | 0.69     |                |         |
| Mother breaks contact (model 8)                                             |          |      |          |          |                |         |
| Intercept                                                                   | 0.04     | 0.23 | -0.45    | 0.46     |                |         |
| Control variables                                                           |          |      |          |          |                |         |
| Infant age <sup>b</sup>                                                     | -0.36    | 0.09 | -0.54    | -0.18    | 15.33          | < 0.001 |
| Infant sex (♂ = 0, ♀ = 1)                                                   | -0.05    | 0.19 | -0.42    | 0.37     | 0.06           | 0.81    |
| Parity (multiparous = 0, primiparous = 1)                                   | 0.73     | 0.18 | 0.35     | 1.08     | 14.31          | < 0.001 |
| Mother's rank <sup>c</sup>                                                  | -0.26    | 0.09 | -0.44    | -0.08    | 8.06           | 0.005   |
| Daytime (early morning vs. late morning) <sup>d</sup>                       | 0.36     | 0.29 | -0.23    | 0.93     | 6.31           | 0.10    |
| Daytime (early morning vs. early afternoon) <sup>d</sup>                    | 0.46     | 0.31 | -0.17    | 1.07     |                |         |
| Daytime (early morning vs. late afternoon) <sup>d</sup>                     | 0.49     | 0.20 | 0.05     | 0.88     |                |         |
| Predictors included in interaction                                          |          |      |          |          |                |         |
| Habitat (forest vs. plantation edge) <sup>a</sup>                           | -0.64    | 0.23 | -1.14    | -0.23    | e              | e       |
| Habitat (forest vs. plantation) <sup>a</sup>                                | -0.98    | 0.29 | -1.58    | -0.47    | e              | e       |
| Infant age <sup>b</sup>                                                     | 0.01     | 0.14 | -0.27    | 0.32     | e              | e       |
| Two-way interaction                                                         |          |      |          |          |                |         |
| Habitat (forest vs. plantation edge) <sup>a</sup> * infant.age              | 0.82     | 0.25 | 0.37     | 1.37     | 16.82          | < 0.001 |
| Habitat (forest vs. plantation) <sup>a</sup> * infant.age                   | 0.74     | 0.21 | 0.33     | 1.18     |                |         |
| Interaction excluded due to non-significance                                |          |      |          |          |                |         |
| Habitat (forest vs. plantation edge) <sup>a</sup> * Infant.age <sup>2</sup> | -0.07    | 0.21 | -0.56    | 0.32     | 0.11           | 0.95    |
| Habitat (forest vs. plantation) <sup>a</sup> * infant.age <sup>2</sup>      | -0.04    | 0.25 | -0.63    | 0.38     |                |         |
| Mother increases distance (model 9)                                         |          |      |          |          |                |         |
| Intercept                                                                   | 1.41     | 0.26 | 0.87     | 1.91     |                |         |
| Control variables                                                           |          |      |          |          |                |         |
| Infant age <sup>b</sup>                                                     | -0.50    | 0.10 | -0.70    | -0.33    | 15.89          | < 0.001 |
| Infant sex (♂ = 0, ♀ = 1)                                                   | -0.45    | 0.42 | -1.32    | 0.38     | 1.24           | 0.27    |
| Parity (multiparous = 0, primiparous = 1)                                   | 0.72     | 0.40 | -0.09    | 1.49     | 2.62           | 0.11    |
| Mother's rank <sup>c</sup>                                                  | -0.17    | 0.19 | -0.56    | 0.18     | 0.75           | 0.39    |
| Daytime (early morning vs. late morning) <sup>d</sup>                       | -0.09    | 0.21 | -0.54    | 0.32     | 2.82           | 0.42    |
| Daytime (early morning vs. early afternoon) <sup>d</sup>                    | -0.19    | 0.19 | -0.55    | 0.22     |                |         |
| Daytime (early morning vs. late afternoon) <sup>d</sup>                     | 0.13     | 0.16 | -0.19    | 0.46     |                |         |
| Predictors included in interaction                                          |          |      |          |          |                |         |
| Habitat (forest vs. plantation edge) <sup>a</sup>                           | -1.75    | 0.34 | -2.54    | -1.09    | e              | e       |
| Habitat (forest vs. plantation) <sup>a</sup>                                | -2.26    | 0.48 | -3.22    | -1.45    | e              | e       |
| Infant age <sup>b</sup>                                                     | 0.79     | 0.17 | 0.48     | 1.10     | e              | e       |
| Two-way interaction                                                         |          |      |          |          |                |         |
| Habitat (forest vs. plantation edge) <sup>a</sup> * infant.age              | 1.04     | 0.20 | 0.66     | 1.50     | 25.56          | < 0.001 |
| Habitat (forest vs. plantation) <sup>a</sup> * infant.age                   | 1.20     | 0.21 | 0.72     | 1.76     |                |         |
| Interaction excluded due to non-significance                                |          |      |          |          |                |         |
| Habitat (forest vs. plantation edge) <sup>a</sup> * Infant.age <sup>2</sup> | 0.08     | 0.21 | -0.47    | 0.46     | 0.19           | 0.91    |
| Habitat (forest vs. plantation) <sup>a</sup> * infant.age <sup>2</sup>      | -0.05    | 0.27 | -0.77    | 0.47     |                |         |

<sup>a</sup> Reference level is forest.

<sup>b</sup> z-transformed to mean = 0 and SD = 1 prior to model fitting; original mean (SD) was 80.98 (49.42).

<sup>c</sup> z-transformed to mean = 0 and SD = 1 prior to model fitting; original mean (SD) was 0.45 (0.32).

<sup>d</sup> Reference level is early morning

<sup>e</sup> Values are not shown because of having a very limited interpretation as they are part of the interaction.
